# Supplementary material
Source: PubMed Central journal article supplement (PMC9472674)
Supplement: ehp11206.smcontents.508.pdf [file ehp11206.smcontents.508.pdf]

**Note to readers with disabilities:** *EHP* strives to ensure that all journal content is accessible to all readers. However, some figures and Supplemental Material published in *EHP* articles may not conform to [508 standards](#) due to the complexity of the information being presented. If you need assistance accessing journal content, please contact [ehp508@niehs.nih.gov](mailto:ehp508@niehs.nih.gov). Our staff will work with you to assess and meet your accessibility needs within 3 working days.

### **Supplemental Material**

#### **Comparison of State-Level Regulations for Cannabis Contaminants and Implications for Public Health**

Laura E. Jameson, Kendra D. Conrow, Dorina V. Pinkhasova, Haleigh L. Boulanger, Hyunji Ha, Negar Jourabchian, Steven A. Johnson, Michael P. Simeone, Iniobong A. Afia, Thomas M. Cahill, Cindy S. Orser, and Maxwell C.K. Leung

#### **Table of Contents**

#### **Identified Regulatory Documents, Public Health Reports, Cannabis Testing Reports, and News Reports**

**Alabama**

**Alaska**

**Arizona**

**Arkansas**

**California**

**Colorado**

**Connecticut**

**Delaware**

**District of Columbia**

**Florida**

**Hawaii**

**Illinois**

**Louisiana**

**Maine**

**Maryland**

**Massachusetts**

**Michigan**

**Minnesota**

**Mississippi**

**Missouri**

**Montana**

**Nevada**

**New Hampshire**

**New Jersey**

**New Mexico**

**New York**

**North Dakota**

**Ohio**

**Oklahoma**

**Oregon**

**Pennsylvania**

**Rhode Island**

**Utah**

**Vermont**

**Virginia**

**Washington**

**West Virginia**

**Additional File-** Excel Document
